# Supplementary material for: Facile dione protection to benzo[1,2-b:6,5-b’]dithiophene-4,5-dione (BDTD) in triggering ultraviolet emission – A new member of the emissive 3,3′-bridged dithiophenes
Source: Royal Society of Chemistry journal article supplement (doi:10.1039/d2ra07492c), 2023-01-01
Supplement: d2ra07492c1.pdf [file d2ra07492c1.pdf]

## Supporting Information

Facile dione protection to benzo[1,2-b:6,5-b']dithiophene-4,5-dione  
(BDTD) in triggering ultraviolet emission, a new member of emissive  
3,3'-bridged dithiophene

Chengpeng Li and Milton Kiefel\*

Institute for Glycomics, Griffith University Gold Coast Campus, Southport,  
Queensland 4222, Australia

### Table of content:

|                                        |    |
|----------------------------------------|----|
| Synthesis of precursors                | 2  |
| NMR spectra for BDTD-5 and 6           | 4  |
| Fluorescence quantum yield measurement | 5  |
| Supporting figures                     | 7  |
| Supporting tables                      | 13 |
| Reference                              | 17 |

## Synthesis of precursors

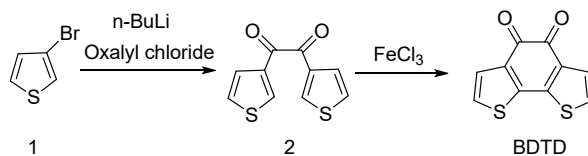

Scheme S1. Synthetic route for BDTD

### 1,2-di(thiophen-3-yl)ethane-1,2-dione<sup>1</sup>

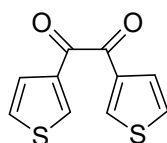

To a solution of n-BuLi (27 mL, 2.5M in hexane) in anhydrous THF (100 mL) 3-bromothiophene (5.7 mL, 61 mmol) was added in drop wise at -78°C. The resulting mixture was allowed to stir for one hour at this temperature and then a solution of LiBr (5.8g, 67 mmol) and CuBr (9.6 g, 67 mmol) in THF (200 mL) was added slowly with an addition funnel maintaining the reaction temperature below -40 °C. After the addition, the reaction mixture was cooled down to -78°C and a solution of oxalyl chloride (2.6 mL, 31 mmol) in THF (10 mL) was added in drop wise. The reaction was kept at -78°C for an hour and then raised to 0°C before quenched with 50 mL of saturated aqueous NH<sub>4</sub>Cl. THF was removed by rotary evaporation and 100 mL of ethyl acetate was added to the resulting mixture. The mixture was transferred to a separation funnel and the aqueous phase was extracted with ethyl acetate (20 mL x 2). The combined organic phase was washed with brine before dried with NaSO<sub>4</sub>. Solvents were then removed by rotary evaporation and the crude product was purified by silica chromatography with hexanes/ethyl acetate (10:1, v/v). A yellow chunky solid was isolated, 5.1g, 74.9% yield. <sup>1</sup>H NMR (400 MHz, CDCl<sub>3</sub>) δ 8.36-8.35 (dd, *J* = 2.9, 1.2 Hz, 2H), 7.70-7.69 (dd, *J* = 5.2, 1.2 Hz, 2H), 7.40-7.38 (dd, 5.2, 2.9 Hz, 2H). <sup>13</sup>C NMR (101 MHz, CDCl<sub>3</sub>) δ 185.77, 137.62, 137.41, 127.56,

126.90, LCMS:  $m/z$ : calcd for  $C_{14}H_{12}O_4S_2$ : 221.98; found: 222.8 (M + H)<sup>+</sup>.

Benzo[1,2-b:6,5-b']dithiophene-4,5-dione (BDTD)

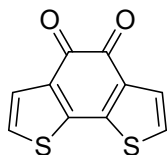

1,2-di(thiophen-3-yl)ethane-1,2-dione (1.8g, 8.1 mmol) was dissolved in dichloromethane (100 mL) and iron trichloride (0.4 g, 24.3 mmol) was then added in one portion. The resulting suspension was allowed to stir over night. 20 mL of water was added to the reaction mixture and stirred for 10 minutes. The resulting solid was filtered and washed with plenty of water. The dark chunk solid was suspended in isopropanol and stirred for over one hour before filtered. The filter cake was then recrystallized from acetonitrile to provide a dark powder, 1.7g, 95.5% yield. <sup>1</sup>H NMR (400 MHz, DMSO-d<sub>6</sub>) δ 7.63-7.62 (d,  $J$  = 5.2 Hz, 2H), 7.46-7.45 (d,  $J$  = 5.2 Hz, 2H). <sup>13</sup>C NMR (101 MHz, DMSO-d<sub>6</sub>) δ 174.57, 142.93, 135.80, 127.57, 127.55. LCMS:  $m/z$ : calcd for  $C_{14}H_{12}O_4S_2$ : 219.97; found: 220.9 (M + H)<sup>+</sup>.

## NMR spectra for BDTD-5 and 6

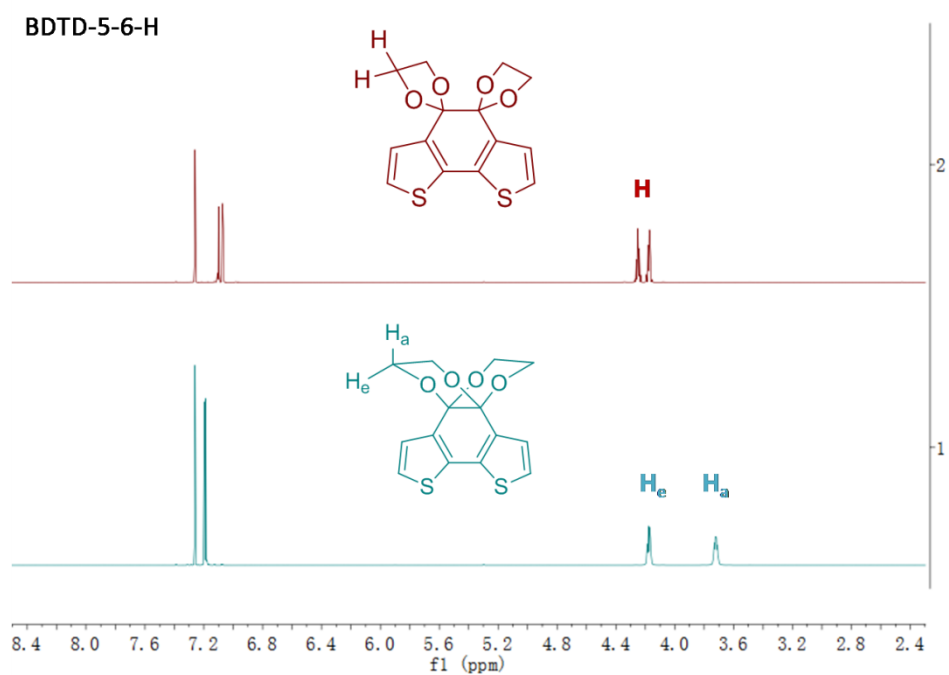

Fig. S1.  $^1\text{H}$  NMR spectra of BDTD-5 and BDTD-6

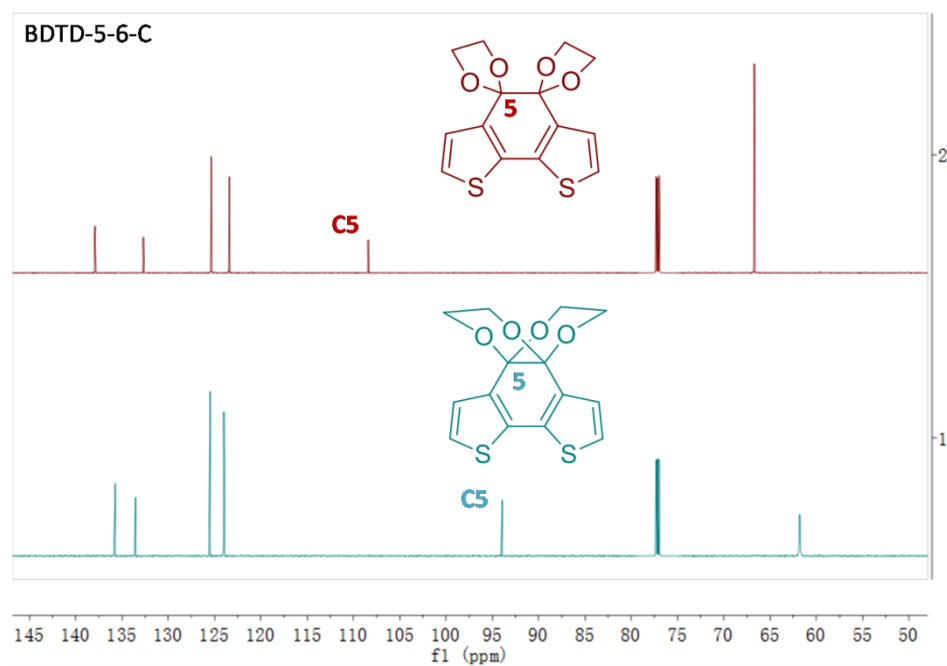

Fig. S2.  $^{13}\text{C}$  NMR spectra of BDTD-5 and BDTD-6

## Fluorescence quantum yield measurement

The quantum yields of BDTD-5 and BDTD-6 in solutions were quantified by comparing the integrated fluorescence intensity of both samples with the emission of quinine sulfate through the following equation.<sup>2</sup>

$$\Phi^i = \frac{F^i f_s n_i^2}{F^s f_i n_s^2} \Phi^s$$

Where  $\Phi^i$  and  $\Phi^s$  are the photoluminescence QY of the sample and the standard, respectively,  $F^i$  and  $F^s$  are the integrated intensities of sample and standard spectra,  $f_x$  is the absorption factor ( $f_x = 1 - 10^{-Ax}$ , where A = absorbance); the refractive indices of the sample and reference solution are  $n_i$  and  $n_s$ , respectively.

Quinine sulfate is the most popular standard by far in determining the quantum yield for other compounds, thus we use this reference to record the QY of our two isomers. However, different authors use slightly different QY values based on different literature citations, and the value cited range from 0.51 to 0.60 in different conditions. In this research, we use the QY value of 0.55, and the condition for this value is the quinine sulfate in a solution of sulfuric acid (0.05 mol L<sup>-1</sup>) with excitation wavelength of 366 nm. Due to the excitation wavelength discrepancy of BDTD isomers and quinine sulfate, we first calibrated the reference value to the according wavelength value of BDTD-5 and 6. Based on the above equation, QY values of quinine sulfate with excitation at 328 nm and 325 nm are calibrated to 0.70 and 0.69, respectively. The QY of BDTD-5 and BDTD-6 are thus calculated based on these two values.

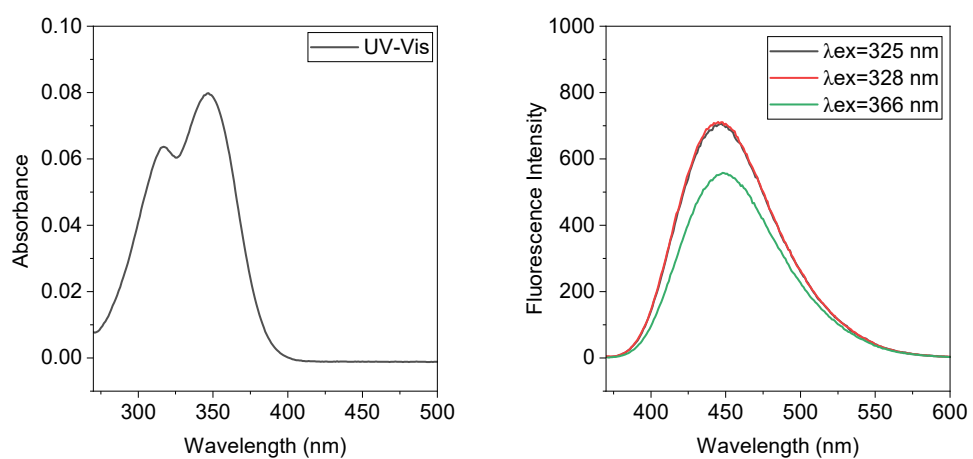

Fig. S3. Absorbance spectrum of quinine sulfate in diluted sulfuric-acid solution ( $0.05 \text{ mol L}^{-1}$ ) (left); fluorescence spectra of quinine sulfate at different excitation wavelength (right)

## Supporting figures

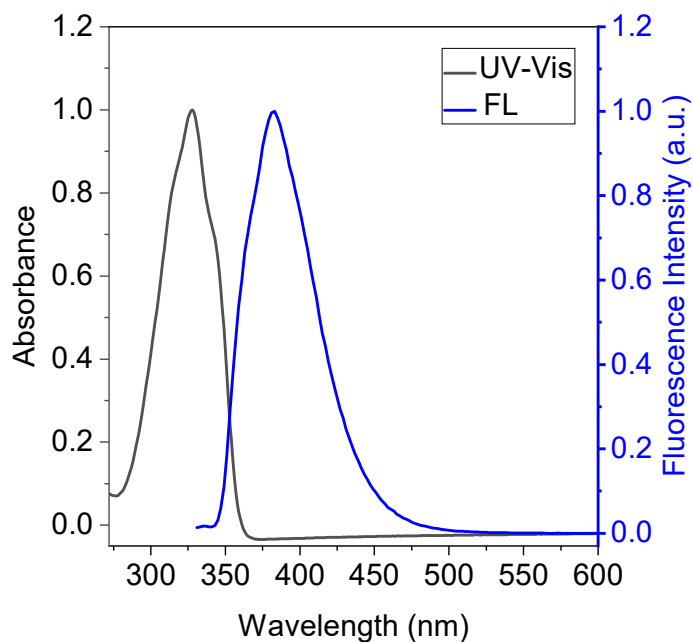

Fig. S4. Normalized absorption and emission spectra of BDTD-5 in methanol ( $5.0 \times 10^{-6} \text{ mol L}^{-1}$ ,  $\lambda_{\text{ex}}=328 \text{ nm}$ )

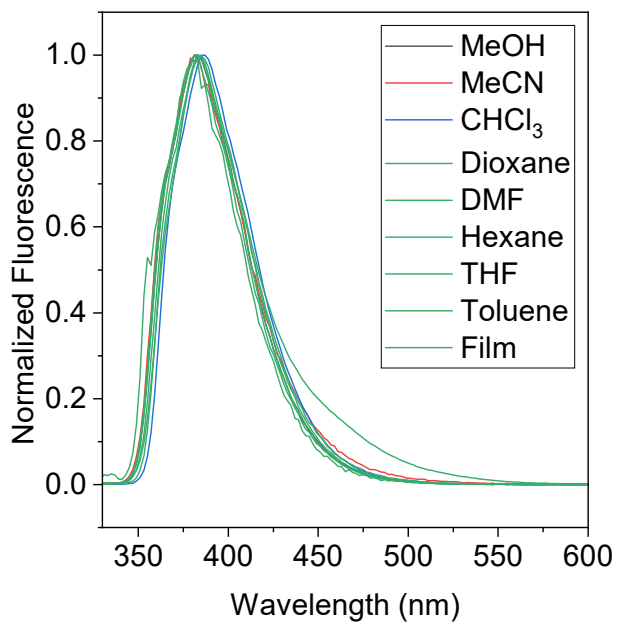

Fig. S5. Normalized fluorescence spectra of BDTD-5 in various solvents and PMMA film ( $\lambda_{\text{ex}}=328 \text{ nm}$ )

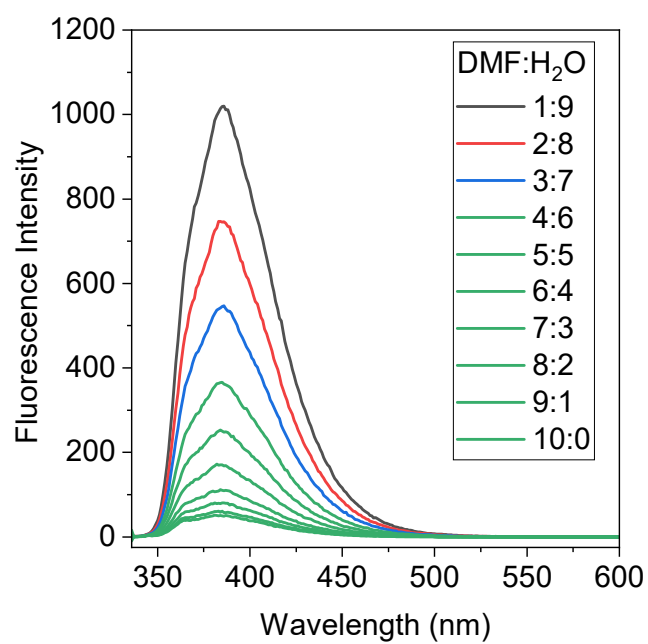

Fig. S6. Emission spectra of BDTD-5 in DMF-H<sub>2</sub>O solution with various fractions of H<sub>2</sub>O,  $5 \times 10^{-6}$  mol L<sup>-1</sup>,  $\lambda_{ex}=328$  nm

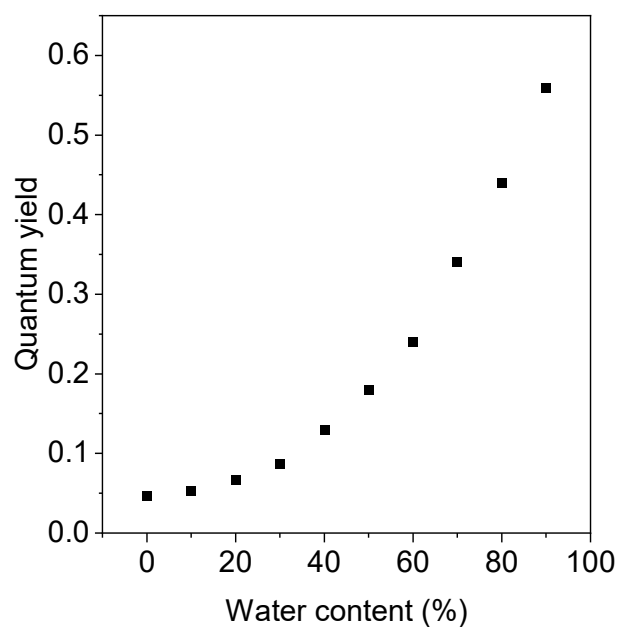

Fig. S7. The quantum yields of BDTD-5 in DMF-H<sub>2</sub>O solution with water fraction from 0-90%,  $5 \times 10^{-6}$  mol L<sup>-1</sup>,  $\lambda_{ex}=328$  nm



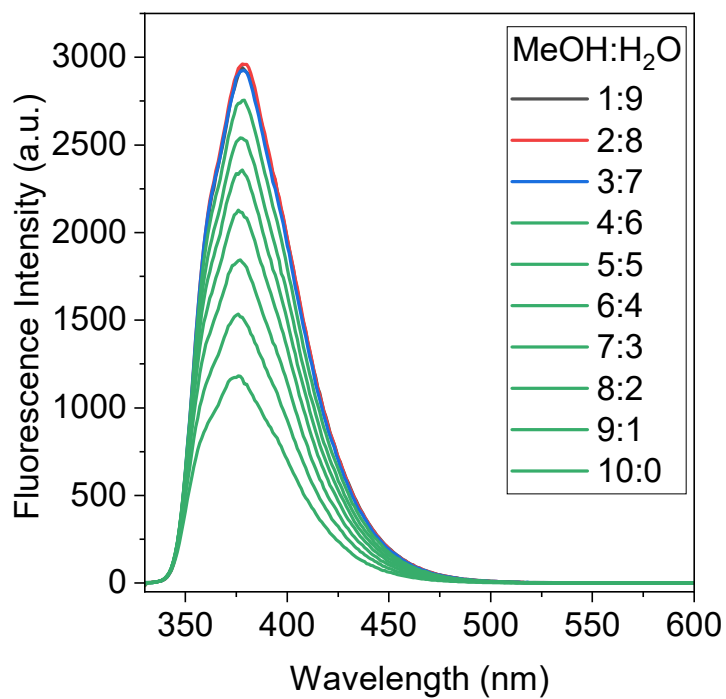

Fig. S8. The emission spectra of BDTD-6 in MeOH-H<sub>2</sub>O solution with water fraction from 0-90%,  $5 \times 10^{-6}$  mol L<sup>-1</sup>,  $\lambda_{ex}=325$  nm

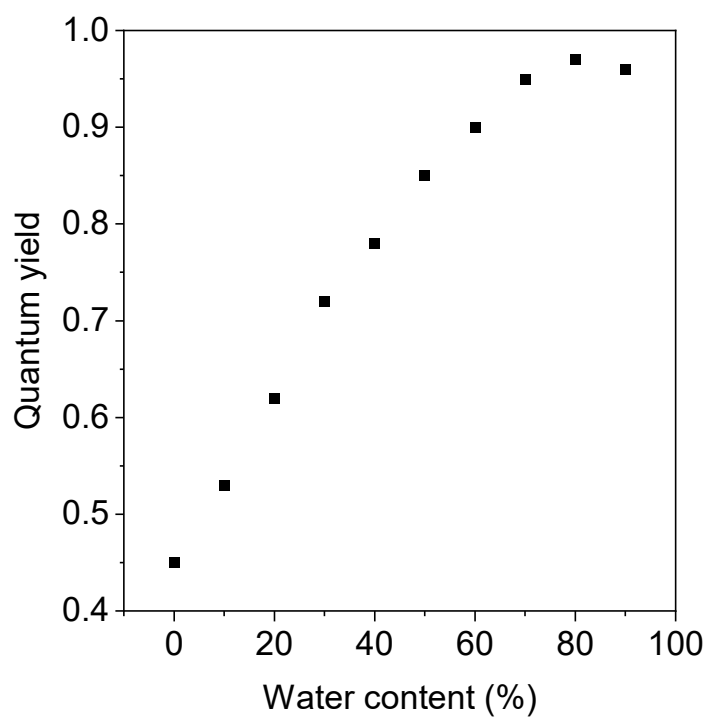

Fig. S9. The quantum yields of BDTD-6 in MeOH-H<sub>2</sub>O solution with water fraction from 0-90%,  $5 \times 10^{-6}$  mol L<sup>-1</sup>,  $\lambda_{ex}=325$  nm

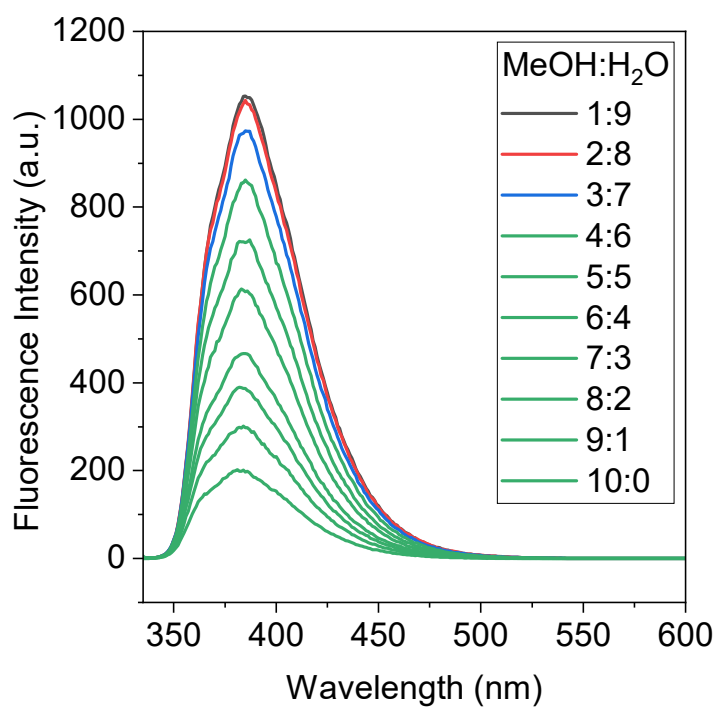

Fig. S10. The emission spectra of BDTD-5 in MeOH-H<sub>2</sub>O solution with water fraction from 0-90%,  $5 \times 10^{-6}$  mol L<sup>-1</sup>,  $\lambda_{ex}=328$  nm

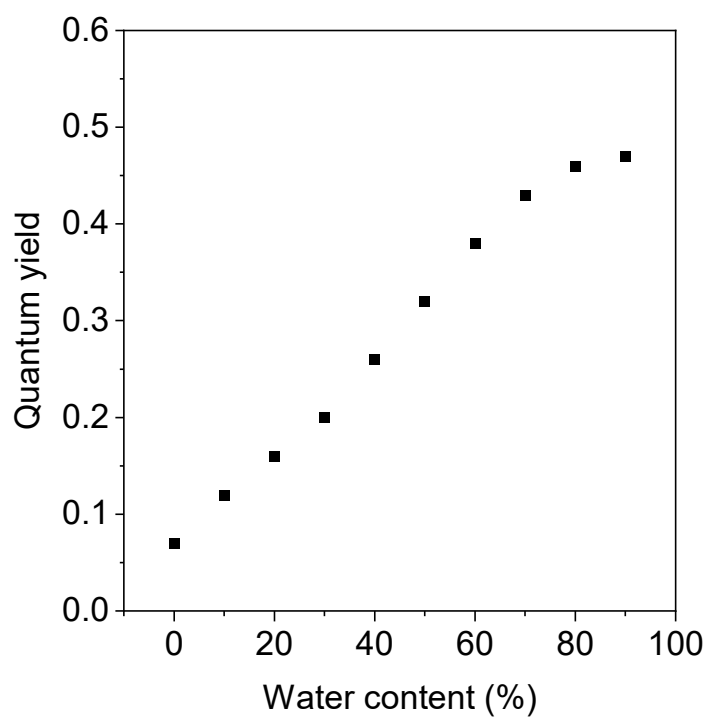

Fig. S11. The quantum yields of BDTD-5 in MeOH-H<sub>2</sub>O solution with water fraction from 0-90%,  $5 \times 10^{-6}$  mol L<sup>-1</sup>,  $\lambda_{ex}=328$  nm

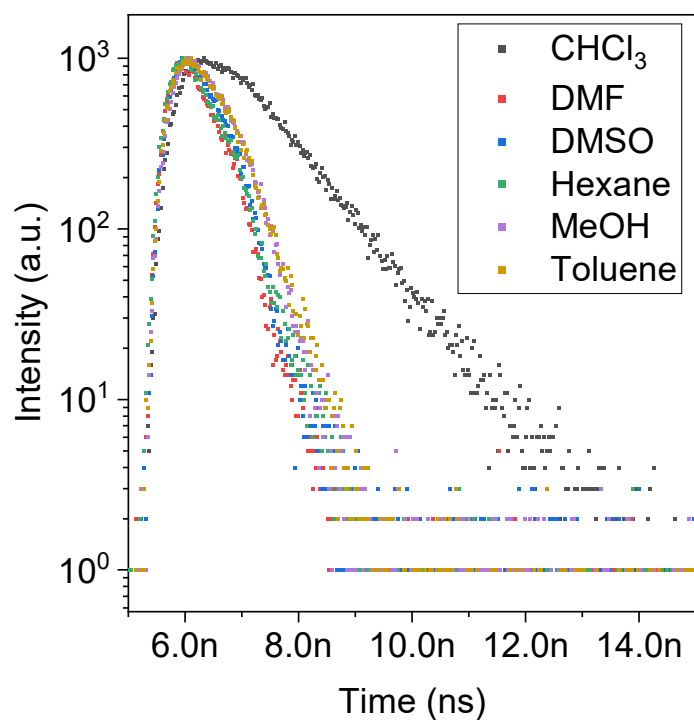

Fig. S12. Photoluminescence lifetime of BDTD-5 in various solvents

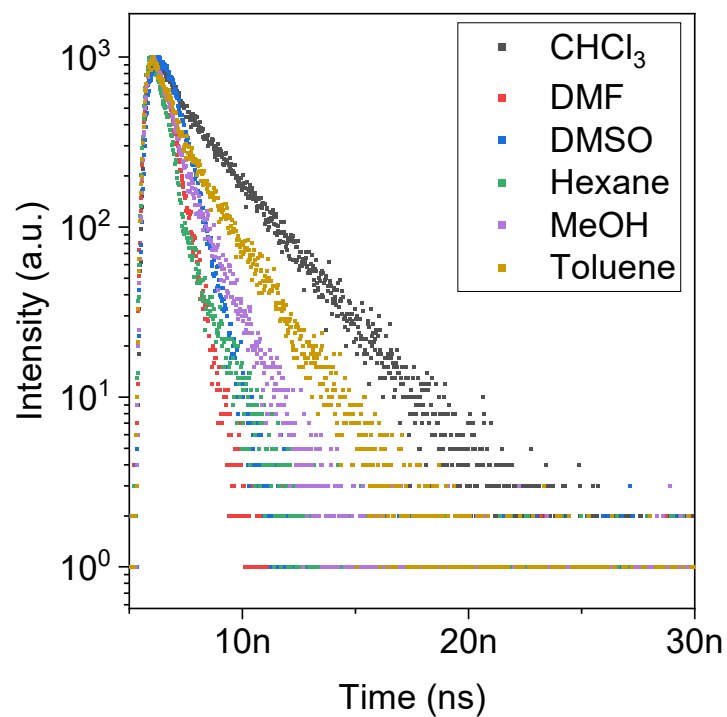

Fig. S13. Photoluminescence lifetime of BDTD-6 in various solvents

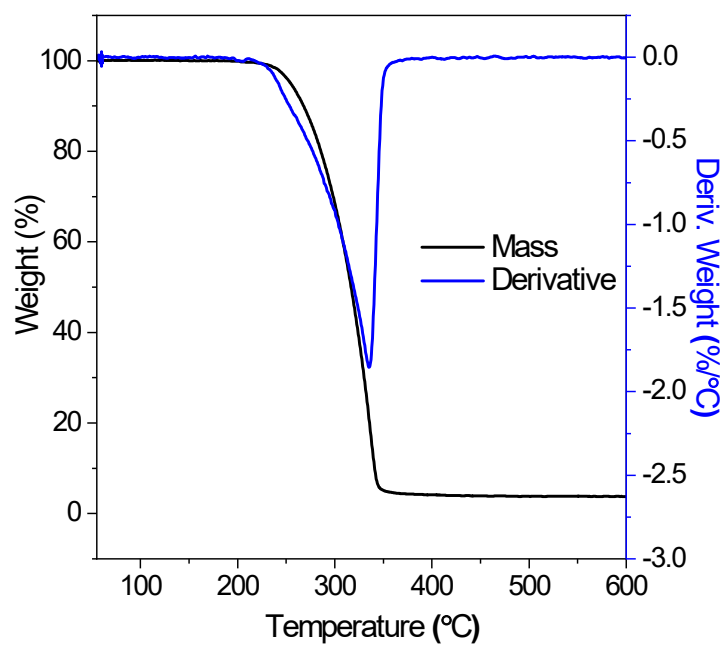

Fig. S14. TG-DTA curves of BDTD-5

## Supporting Tables

Table S1. Quantum-yield determination for BDTD-5 in various DMF-H<sub>2</sub>O fractions with the reference of quinine sulphate

| BDTD-5<br>DMF:H <sub>2</sub> O | Abs   | I        | Abs(ref) | I(ref)   | n(ref) | n     | QY(ref<br>) | QY    |
|--------------------------------|-------|----------|----------|----------|--------|-------|-------------|-------|
| 10:0                           |       | 2881.715 |          |          |        | 1.35  |             | 0.047 |
| 9:1                            |       | 3385.869 |          |          |        | 1.315 |             | 0.053 |
| 8:2                            |       | 4538.025 |          |          |        | 1.28  |             | 0.067 |
| 7:3                            |       | 6246.1   |          |          |        | 1.245 |             | 0.087 |
| 6:4                            | 0.088 | 9606.635 | 0.060    | 57965.68 | 1.0    | 1.21  | 0.70        | 0.13  |
| 5:5                            |       | 14230.15 |          |          |        | 1.175 |             | 0.18  |
| 4:6                            |       | 20787.91 |          |          |        | 1.14  |             | 0.24  |
| 3:7                            |       | 31180.96 |          |          |        | 1.105 |             | 0.34  |
| 2:8                            |       | 42627.5  |          |          |        | 1.07  |             | 0.44  |
| 1:9                            |       | 58190.68 |          |          |        | 1.035 |             | 0.56  |

Table S2. Quantum-yield determination for BDTD-6 in various DMF-H<sub>2</sub>O fractions with the reference of quinine sulphate

| BDTD-6<br>DMF:H <sub>2</sub> O | Abs   | I        | Abs(ref) | I(ref)   | n(ref) | n     | QY(ref<br>) | QY   |
|--------------------------------|-------|----------|----------|----------|--------|-------|-------------|------|
| 10:0                           |       | 16017.63 |          |          |        | 1.35  |             | 0.27 |
| 9:1                            |       | 18132.12 |          |          |        | 1.315 |             | 0.29 |
| 8:2                            |       | 21116.99 |          |          |        | 1.28  |             | 0.32 |
| 7:3                            |       | 25808.64 |          |          |        | 1.245 |             | 0.37 |
| 6:4                            | 0.079 | 32492.56 | 0.060    | 57965.68 | 1.0    | 1.21  | 0.69        | 0.44 |
| 5:5                            |       | 40722.05 |          |          |        | 1.175 |             | 0.52 |
| 4:6                            |       | 51580.32 |          |          |        | 1.14  |             | 0.62 |
| 3:7                            |       | 64639.85 |          |          |        | 1.105 |             | 0.73 |
| 2:8                            |       | 79325.67 |          |          |        | 1.07  |             | 0.84 |
| 1:9                            |       | 96893.03 |          |          |        | 1.035 |             | 0.96 |

Table S3. Crystal data and structure refinement for both BDTD-5 and BDTD-6

| Structural information            | BDTD-6                                                        | BDTD-5                                                        |
|-----------------------------------|---------------------------------------------------------------|---------------------------------------------------------------|
| CCDC deposited number             | 2090190                                                       | 2090187                                                       |
| Empirical formula                 | C <sub>14</sub> H <sub>12</sub> O <sub>4</sub> S <sub>2</sub> | C <sub>14</sub> H <sub>12</sub> O <sub>4</sub> S <sub>2</sub> |
| Formula weight                    | 308.36                                                        | 308.36                                                        |
| Temperature/K                     | 293(2)                                                        | 149.99(10)                                                    |
| Crystal system                    | monoclinic                                                    | monoclinic                                                    |
| Space group                       | P2 <sub>1</sub> /c                                            | Cc                                                            |
| a/Å                               | 11.3942(2)                                                    | 13.9393(3)                                                    |
| b/Å                               | 8.4872(2)                                                     | 12.5328(2)                                                    |
| c/Å                               | 13.8579(3)                                                    | 7.40660(10)                                                   |
| β/°                               | 103.512(2)                                                    | 96.018(2)                                                     |
| Volume/Å <sup>3</sup>             | 1303.03(5)                                                    | 1286.79(4)                                                    |
| Z                                 | 4                                                             | 4                                                             |
| Crystal size/mm <sup>3</sup>      | n.d. <sup>a</sup>                                             | 0.26 × 0.19 × 0.15                                            |
| Radiation                         | Cu Kα (λ = 1.54184)                                           | Mo Kα (λ = 0.71073)                                           |
| 2θ range for data collection/°    | 7.98 to 148.186                                               | 6.502 to 73.492                                               |
| Index ranges                      | -13 ≤ h ≤ 12, -10 ≤ k ≤ 10, -16 ≤ l ≤ 17                      | -23 ≤ h ≤ 23, -20 ≤ k ≤ 20, -12 ≤ l ≤ 12                      |
| Reflections collected             | 4951                                                          | 17191                                                         |
| Independent reflections           | 2566 [R <sub>int</sub> = 0.0186, R <sub>sigma</sub> = 0.0241] | 6033 [R <sub>int</sub> = 0.0269, R <sub>sigma</sub> = 0.0309] |
| Data/restraints/parameters        | 2566/0/181                                                    | 6033/2/181                                                    |
| Goodness-of-fit on F <sup>2</sup> | 0.540                                                         | 1.045                                                         |
| Final R indexes [I >= 2σ (I)]     | R <sub>1</sub> = 0.0282, wR <sub>2</sub> = 0.0786             | R <sub>1</sub> = 0.0287, wR <sub>2</sub> = 0.0732             |
| Final R indexes [all data]        | R <sub>1</sub> = 0.0293, wR <sub>2</sub> = 0.0803             | R <sub>1</sub> = 0.0302, wR <sub>2</sub> = 0.0748             |

<sup>a</sup> the crystal dimension was not obtained during crystallographic analysis

Table S4. Bond Lengths of Calculated Geometry and Experimentally Derived Structure of BDTD-5 and 6

| BDTD-5  | Crystal bond length (Å) | DFT optimized bond length (Å) | Bond length difference (Å) | BDTD-6  | Crystal bond length (Å) | DFT optimized bond length (Å) | Bond length difference (Å) |
|---------|-------------------------|-------------------------------|----------------------------|---------|-------------------------|-------------------------------|----------------------------|
| S1-C10  | 1.7233(14)              | 1.741                         | 0.018                      | S2-C9   | 1.7210(14)              | 1.741                         | 0.020                      |
| S1-C1   | 1.7223(16)              | 1.740                         | 0.018                      | S2-C8   | 1.7180(16)              | 1.741                         | 0.023                      |
| S2-C9   | 1.7201(13)              | 1.741                         | 0.021                      | S1-C10  | 1.7245(14)              | 1.742                         | 0.018                      |
| S2-C8   | 1.7206(18)              | 1.740                         | 0.021                      | S1-C1   | 1.7215(15)              | 1.741                         | 0.020                      |
| O4-C5   | 1.4259(16)              | 1.430                         | 0.004                      | O3-C5   | 1.4189(16)              | 1.425                         | 0.006                      |
| O4-C14  | 1.431(2)                | 1.422                         | 0.009                      | O3-C13  | 1.4353(17)              | 1.429                         | 0.006                      |
| O2-C4   | 1.4262(16)              | 1.427                         | 0.001                      | O2-C5   | 1.4123(16)              | 1.411                         | 0.001                      |
| O2-C12  | 1.4259(18)              | 1.426                         | 0.000                      | O2-C12  | 1.4455(17)              | 1.433                         | 0.013                      |
| O3-C5   | 1.4123(17)              | 1.420                         | 0.008                      | O4-C4   | 1.4134(16)              | 1.411                         | 0.002                      |
| O3-C13  | 1.434(2)                | 1.432                         | 0.002                      | O4-C14  | 1.4420(18)              | 1.433                         | 0.009                      |
| O1-C4   | 1.4118(16)              | 1.422                         | 0.010                      | O1-C4   | 1.4193(16)              | 1.425                         | 0.006                      |
| O1-C11  | 1.4315(19)              | 1.431                         | 0.001                      | O1-C11  | 1.4352(18)              | 1.429                         | 0.006                      |
| C10-C3  | 1.3759(18)              | 1.379                         | 0.003                      | C6-C7   | 1.4190(19)              | 1.423                         | 0.004                      |
| C10-C9  | 1.4497(19)              | 1.446                         | 0.004                      | C6-C9   | 1.369(2)                | 1.379                         | 0.010                      |
| C3-C4   | 1.511(2)                | 1.515                         | 0.004                      | C6-C5   | 1.5129(18)              | 1.516                         | 0.003                      |
| C3-C2   | 1.4159(18)              | 1.421                         | 0.005                      | C10-C9  | 1.4455(19)              | 1.433                         | 0.013                      |
| C4-C5   | 1.5522(18)              | 1.566                         | 0.014                      | C10-C3  | 1.3725(19)              | 1.379                         | 0.007                      |
| C2-C1   | 1.368(2)                | 1.369                         | 0.001                      | C7-C8   | 1.363(2)                | 1.368                         | 0.005                      |
| C5-C6   | 1.5092(19)              | 1.516                         | 0.007                      | C4-C5   | 1.5636(19)              | 1.58                          | 0.016                      |
| C9-C6   | 1.3751(19)              | 1.380                         | 0.005                      | C4-C3   | 1.5088(19)              | 1.516                         | 0.007                      |
| C6-C7   | 1.4242(19)              | 1.422                         | 0.002                      | C3-C2   | 1.419(2)                | 1.423                         | 0.004                      |
| C14-C13 | 1.513(3)                | 1.524                         | 0.011                      | C2-C1   | 1.360(2)                | 1.368                         | 0.008                      |
| C12-C11 | 1.512(2)                | 1.526                         | 0.014                      | C11-C12 | 1.500(2)                | 1.514                         | 0.014                      |
| C7-C8   | 1.365(2)                | 1.369                         | 0.004                      | C13-C14 | 1.502(2)                | 1.514                         | 0.012                      |

Table S5. Comparison of TG data between BDTD-5 and BDTD-6

| Compound | T <sub>5</sub> <sup>a</sup> [°C] | T <sub>10</sub> <sup>b</sup> [°C] | T <sub>max</sub> <sup>c</sup> [°C] |
|----------|----------------------------------|-----------------------------------|------------------------------------|
| BDTD-5   | 254                              | 267                               | 335                                |
| BDTD-6   | 248                              | 260                               | 312                                |

a. T<sub>5</sub> is the temperature at 5% weight loss.

b. T<sub>10</sub> is the temperature at 10% weight loss.

c. Temperature of maximum decomposition rate.



## References

1. C. A. R. Frank A. Arroyave, and John R. Reynolds, *Org. Lett.*, 2012, **14**, 4.
2. A. M. Brouwer, *Pure Appl. Chem.*, 2011, **83**, 2213–2228.
